# Supplementary material for: An open source multistep model to predict mutagenicity from statistical analysis and relevant structural alerts
Source: PubMed Central journal article supplement (PMC2913329; doi:10.1186/1752-153x-4-s1-s2), 2010-07-29
Supplement: 1752-153X-4-S1-S2-S4.pdf [file 1752-153X-4-S1-S2-S4.pdf]

# 1<sup>st</sup> SAs RULESET

| Structural Alert                                                                                                                                            | SMARTS or details                                                                               |
|-------------------------------------------------------------------------------------------------------------------------------------------------------------|-------------------------------------------------------------------------------------------------|
| <p><b>SA_1: Acyl halides</b></p> 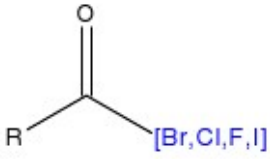 <p>R = any atom/group, except OH, SH</p> | <p>[!\$([OH1,SH1])]C(=O)[Br,Cl,F,I]</p>                                                         |
| <p><b>SA_6: Propiolactones or propiosultones</b></p>                       | <p>[O,S]=C1[O,S]CC1<br/>OR<br/>O=S1(=O)(CCC1)</p>                                               |
| <p><b>SA_12: Quinones</b></p>  <p>R = any atom/group</p>                  | <p>O=[#6]1[#6]=,:[#6][#6](=O)[#6]=,:[#6]1<br/>OR<br/>O=[#6]1[#6]=,:[#6][#6]=,:[#6][#6]1(=O)</p> |
| <p><b>SA_13: Hydrazine</b></p>                                           | <p>[N+0]!@;-[N+0](=!0;!N)<br/>OR<br/>[N+0]([#1,*])!@;-[N+0]([#1,*])</p>                         |

# 1<sup>st</sup> SAs RULESET

## Structural Alert

## SMARTS or details

### SA\_14: Aliphatic azo and azoxy

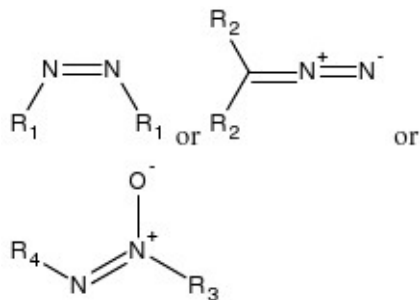

R1 = Aliphatic carbon or hydrogen  
 R2, R3 = Any atom/group  
 R4 = Aliphatic carbon

[C,#1]N=[NX2][C,#1]  
 OR  
[\$(C=[N+]=[N-]);!(C=[N+]=[N-]=N);!\$(C=[N+]=[N-]N)]  
 OR  
C=[\$(N=N);!(N=N=N);!\$(N=NN)]  
 OR  
CN=NO

### SA\_16: alkyl carbamate and thiocarbamate

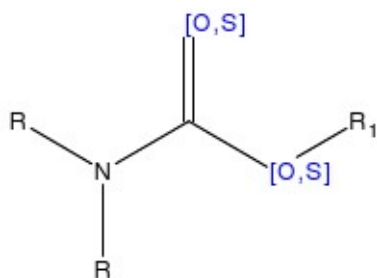

R = Aliphatic carbon or hydrogen  
 R1 = Aliphatic carbon

[NX3]([CX4,#1])([CX4,#1])C(=[O,S])[O,S][CX4]

### SA\_18: Polycyclic Aromatic Hydrocarbons

Three or more fused rings, not heteroaromatic

## 1<sup>st</sup> SAs RULESET

| Structural Alert                                                                                                                                                                                                                                 | SMARTS or details                                                                                                                                                                                                                                                    |
|--------------------------------------------------------------------------------------------------------------------------------------------------------------------------------------------------------------------------------------------------|----------------------------------------------------------------------------------------------------------------------------------------------------------------------------------------------------------------------------------------------------------------------|
| <p><b>SA_21: alkyl and aryl N-nitroso groups</b></p> 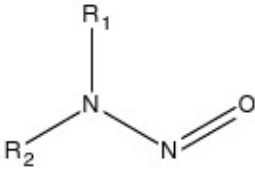 <p>R1 = Aliphatic or aromatic carbon,<br/>R2 = Any atom/group</p>                                         | <p>[C, c]N[NX2;v3]=O</p>                                                                                                                                                                                                                                             |
| <p><b>SA_22: azide and triazene groups</b></p>  <p>R = Any atom/group</p>                                                                                       | <p>[N]=[N] - [N]<br/>OR<br/>[N]=[N]=[N]</p>                                                                                                                                                                                                                          |
| <p><b>SA_25: aromatic nitroso group</b></p>  <p>Ar = Any aromatic/heteroaromatic ring</p>                                                                      |                                                                                                                                                                                                                                                                      |
| <p><b>SA_28bis: Aromatic mono- and dialkylamine</b></p>  <p>Ar = Any aromatic/heteroaromatic ring<br/>R1 = Hydrogen, methyl, ethyl<br/>R2 = Methyl, ethyl</p> | <ul style="list-style-type: none"> <li>Chemicals with ortho-disubstitution, or with an ortho carboxylic acid substituent are excluded.</li> <li>Chemicals with a sulfonic acid group (-SO<sub>3</sub>H) on the same ring of the amino group are excluded.</li> </ul> |
| <p><b>SA_29: Aromatic diazo</b></p>  <p>Ar = Any aromatic/heteroaromatic ring</p>                                                                             | <ul style="list-style-type: none"> <li>Chemicals with a sulfonic acid group (-SO<sub>3</sub>H) on both rings linked to the diazo group are excluded.</li> </ul>                                                                                                      |

## 2<sup>nd</sup> SAs RULESET

| Structural Alert                                                                                                                                                                                              | SMARTS or details                                                                                                                                                                                                                                                         |
|---------------------------------------------------------------------------------------------------------------------------------------------------------------------------------------------------------------|---------------------------------------------------------------------------------------------------------------------------------------------------------------------------------------------------------------------------------------------------------------------------|
| <p><b>SA_7: Epoxides and aziridines</b></p> <div style="text-align: center;"> 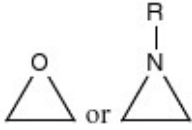 </div> <p>R = any atom/group</p>              | <p>C1[O,N]C1</p>                                                                                                                                                                                                                                                          |
| <p><b>SA_8: Aliphatic halogens</b></p> <div style="text-align: center;">  </div> <p>R = any atom/group</p>                   |                                                                                                                                                                                                                                                                           |
| <p><b>SA_19: Heterocyclic Polycyclic Aromatic Hydrocarbons</b></p>                                                                                                                                            | <p>Three or more fused rings, heteroaromatic</p>                                                                                                                                                                                                                          |
| <p><b>SA_27: Nitro-aromatic</b></p> <div style="text-align: center;">  </div> <p>Ar = Any aromatic/heteroaromatic ring</p> | <ul style="list-style-type: none"> <li>• Chemicals with ortho-disubstitution, or with an ortho carboxylic acid substituent are excluded.</li> <li>• Chemicals with a sulfonic acid group (-SO<sub>3</sub>H) on the same ring of the nitro group are excluded .</li> </ul> |
